# Supplementary material for: Exploring Morphine-Triggered PKC-Targets and Their Interaction with Signaling Pathways Leading to Pain via TrkA
Source: MDPI journal article supplement (doi:10.3390/proteomes6040039), 2018-10-06
Supplement: s1 [file s1]

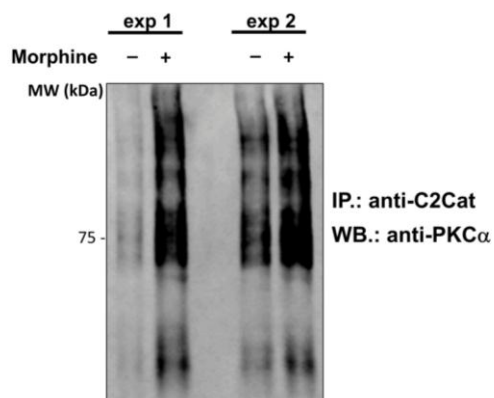

**Figure S1. PKC $\alpha$  was immunoprecipitated with anti-C2Cat antibody following morphine treatment.** Western blot probing for PKC $\alpha$  in two of the three samples processed for protein quantification and identification experiments by Mass Spectrometry, in the presence and absence of 1  $\mu$ M Morphine for three minutes. No reactivity with anti PKC $\alpha$  was found in samples immunoprecipitated with Pre-immune serum (data not shown).
